# Supplementary material
Source: PubMed Central journal article supplement (PMC7733852)
Supplement: pnas.2016872117.sapp.pdf [file pnas.2016872117.sapp.pdf]

# PNAS

www.pnas.org

1  
2  
3  
4  
5  
6  
7  
8  
9  
10  
11  
12  
13  
14  
15  
16  
17  
18  
19  
20  
21  
22  
23  
24  
25  
26  
27  
28  
29  
30  
31  
32  
33  
34  
35  
36  
37  
38  
39  
40  
41

Supplementary Information for

Bumblebees perceive the spatial layout of their environment in relation to their body size and form to minimize inflight collisions

Sridhar Ravi<sup>1&2\*</sup>, Tim Siesenop<sup>1</sup>, Olivier Bertrand<sup>1</sup>, Liang Li<sup>3</sup>, Charlotte Dousott<sup>1</sup>, William Warren<sup>4</sup>, Stacey Combes<sup>5</sup> and Martin Egelhaaf<sup>1</sup>

\*Sridhar Ravi

**Email:** Sridhar.ravi@adfa.edu.au

**This PDF file includes:**

- Supplementary text
- Figures S1 to S7
- Tables S1 to S11
- Legends for Movies S1 to S7
- Legend for Dataset
- SI References

**Other supplementary materials for this manuscript include the following:**

- Movies S1 to S7

42

### 43 **Estimation of gap-size by peering**

44 Prior studies on bees and other insects have revealed that bees use optic flow for flight stabilization  
45 and control, and use spatial and temporal variations in optic flow for edge identification (1, 2), depth  
46 and gap perception (3–5). We hypothesize a simpler mechanism by which bees could determine  
47 the spatial properties of a gap (gap size) based on the peering motions they perform (Fig. 1 & S3).  
48 Assuming that bees are capable of identifying the edge of the gap(6) and monitoring the optic flow  
49 induced by the gap edges during peering motions, gap size could be obtained as follows:

50 Bees produce oscillating lateral motions by directing the aerodynamic force in the lateral direction  
51 through rotation of the body along the longitudinal axis (i.e. body roll) (7–9). It is known that for  
52 small roll angles, the bee's lateral acceleration ( $a$ ) is directly proportional to its roll angle ( $\rho$ ) (9, 10):

$$53 \quad a = g\rho \quad (1)$$

54 Where  $g$  is the acceleration due to gravity, see Fig. S6.

55 For smaller apertures the bees tended to reduce their forward velocity in the vicinity of the gap and  
56 mainly engaged in lateral manoeuvring in front of the gaps' edges, Fig. 1&2. Therefore, neglecting  
57 the forward flight and considering a peering pass that consists of steady lateral acceleration from  
58 rest, for a given instantaneous roll angle, the bee's lateral velocity ( $V$ ) is directly proportional to the  
59 elapsed time ( $t$ ), from Equ. 1:

$$60 \quad V = at \text{ or } V = g\rho t \quad (2)$$

61 Bees mainly use monocular vision and their eyes can be approximated as a sphere and the retina  
62 as a point – a similar approach has been used in numerous previous studies (11–13). The general  
63 equation for the true optic flow of an arbitrary point ( $\dot{\beta}$ ) due to the velocity of the bee (Fig. S6) can  
64 be expressed following the expression in (14):

$$65 \quad \dot{\beta} = \frac{v \sin \beta}{d} \quad (3)$$

66 Where  $\beta$  is the visual angle between the direction of flight and the direction to the point in space,  $d$   
67 is the distance to the point, and  $\dot{\beta}$  is the optical velocity of the point (Fig. S6). See (15) for  
68 elaboration on optic flow.

69 Rearranging Equ. 3, the distance between the bee and the point can be expressed as:

$$70 \quad d = \frac{v \sin \beta}{\dot{\beta}} \quad (4)$$

71 Considering Fig. S6, using Equ. 4 the distances between the bee and the left and right edges of  
72 the gap can be expressed as:

$$73 \quad d_L = \frac{v \sin \beta_L}{\dot{\beta}_L} \quad d_R = \frac{v \sin \beta_R}{\dot{\beta}_R} \quad (5)$$

74 The widths of left and right parts of the gap (Fig. S6) are:

$$75 \quad G_L = d_L \sin \alpha_L \quad G_R = d_R \sin \alpha_R \quad (6)$$

76 And the total gap width is given by

$$77 \quad G = G_L + G_R \quad (7)$$

78 Substituting Equ. 5 & 6 into 7:

$$79 \quad G = V \left( \frac{\sin \beta_L \sin \alpha_L}{\dot{\beta}_L} + \frac{\sin \beta_R \sin \alpha_R}{\dot{\beta}_R} \right) \quad (8)$$

80 Expressing the velocity of the bee ( $V$ ) in terms of the body roll angle by substituting Equ. 2 into 8

$$81 \quad G = g\rho t \left( \frac{\sin \beta_L \sin \alpha_L}{\dot{\beta}_L} + \frac{\sin \beta_R \sin \alpha_R}{\dot{\beta}_R} \right) \quad (9)$$

82  $\alpha$  can be eliminated as follows from Fig. S6:

$$83 \quad \alpha_L = -(90^\circ - \beta_L) \quad (10)$$

$$84 \quad \sin \alpha_L = \sin[-(90^\circ - \beta_L)] = \cos(-\beta_L) = \cos \beta_L \quad (11)$$

$$85 \quad \alpha_R = 90^\circ - \beta_R \quad (12)$$

$$86 \quad \sin \alpha_R = \sin(90^\circ - \beta_R) = \cos \beta_L \quad (13)$$

87 Substituting Equ. 11 & 13 into 9 yields the following simplified equation:

88 
$$G = g\rho t \left( \frac{\sin\beta_L \cos\beta_L}{\dot{\beta}_L} + \frac{\sin\beta_R \cos\beta_R}{\dot{\beta}_R} \right) \quad (14)$$

89 Thus, the absolute gap width is specified by the optical velocities of the left and right edges ( $\dot{\beta}$ ) and  
90 the visual directions of the left and right edges relative to the flight direction ( $\beta$ ), scaled by the bee's  
91 roll angle ( $\rho$ ) and elapsed time ( $t$ ) during the lateral maneuvers. Gap width is given in the same  
92 length unit as  $a$  and  $V$ , which might be calibrated during development as wingspans/sec. Thus,  
93 gap width would be scaled to wingspans.

94 In order to employ this method of gap-size estimation during lateral peering, bees must be able to  
95 perceive the optic flow and angular position of either edge of the gap on their retina, and must also  
96 encode their instantaneous body roll angle ( $\rho$ ). While limited direct evidence exists of bees  
97 encoding their body orientation for spatial perception, insects stabilize their head during voluntary  
98 manoeuvres by performing coordinated counter rotations with respect to the body (16–18). This  
99 behaviour suggests that insects indeed possess the capacity to measure and monitor the relative  
100 angular position of the head and body. Further research to test whether bees indeed use a  
101 combination of optic flow and ego motion estimation for spatial perception will be useful.

102 This derived method relies on using body roll as a proxy for lateral acceleration (i.e. ego motion)  
103 and could explain the following behaviors displayed by the bees: lateral acceleration produced by  
104 body roll is insensitive to body size and therefore big and small bees need to perform similar  
105 maneuvers to estimate gap size. The peering amplitude of the bees was found to be bodysize  
106 insensitive for all gap-sizes presented. The method presented here relies on lateral maneuvers  
107 being performed within the edges of the gaps. For all gap-sizes, the peering motion was mainly  
108 between the edges of the gap and the mean peering amplitude was smaller than gap width.

109  
110  
111  
112  
113  
114  
115  
116  
117  
118  
119  
120  
121  
122  
123  
124  
125  
126  
127  
128  
129  
130  
131  
132  
133  
134  
135  
136  
137  
138  
139

140 **Supplementary Figures**  
 141  
 142

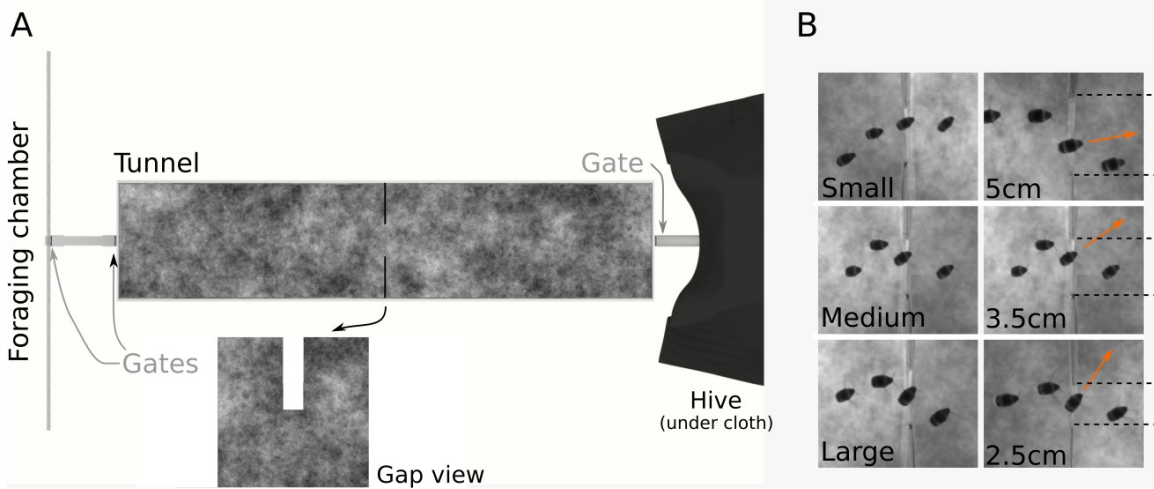

143 Figure S1: (a) Schematic of experimental setup presented from top-view, see SV1 for animated  
 144 rendering of experiment setup. (b) Snapshot of bees of different sizes passing through gaps of  
 145 varying widths. (1)  $W_s = 22\text{mm}$ ,  $G_s = 40\text{mm}$ ,  $\text{Yaw} = 29^\circ$  (2)  $W_s = 26\text{mm}$ ,  $G_s = 40\text{mm}$ ,  $\text{Yaw} = 40^\circ$   
 146 (3)  $W_s = 31\text{mm}$ ,  $G_s = 40\text{mm}$ ,  $\text{Yaw} = 66^\circ$  (4)  $W_s = 31\text{mm}$ ,  $G_s = 50\text{mm}$ ,  $\text{Yaw} = 8^\circ$  (5)  $W_s = 26\text{mm}$ ,  
 147  $G_s = 35\text{mm}$ ,  $\text{Yaw} = 31^\circ$  (6)  $W_s = 28\text{mm}$ ,  $G_s = 25\text{mm}$ ,  $\text{Yaw} = 78^\circ$   
 148  
 149  
 150  
 151  
 152  
 153  
 154  
 155  
 156  
 157  
 158  
 159  
 160  
 161  
 162  
 163  
 164  
 165  
 166  
 167  
 168  
 169

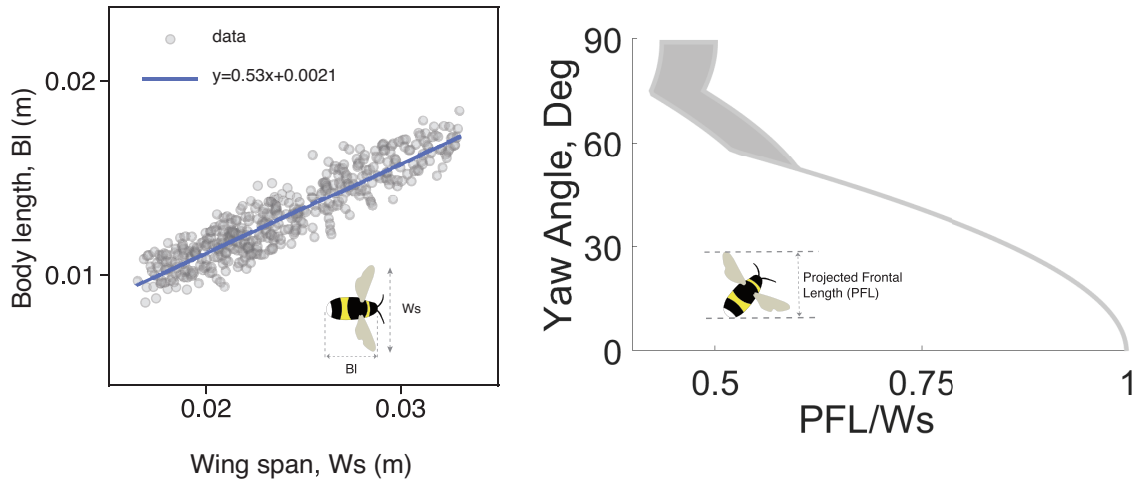

170  
 171  
 172  
 173  
 174  
 175  
 176

Figure S2: (a) Scatter representation of the wingspan and body length of bees during steady level flight with a linear fit relating the two morphological properties ( $n=400$ ),  $R$ -squared = 0.89. (b) The projected frontal length (PFL) of all bees normalized with respect to wingspan for different yaw/heading angles.

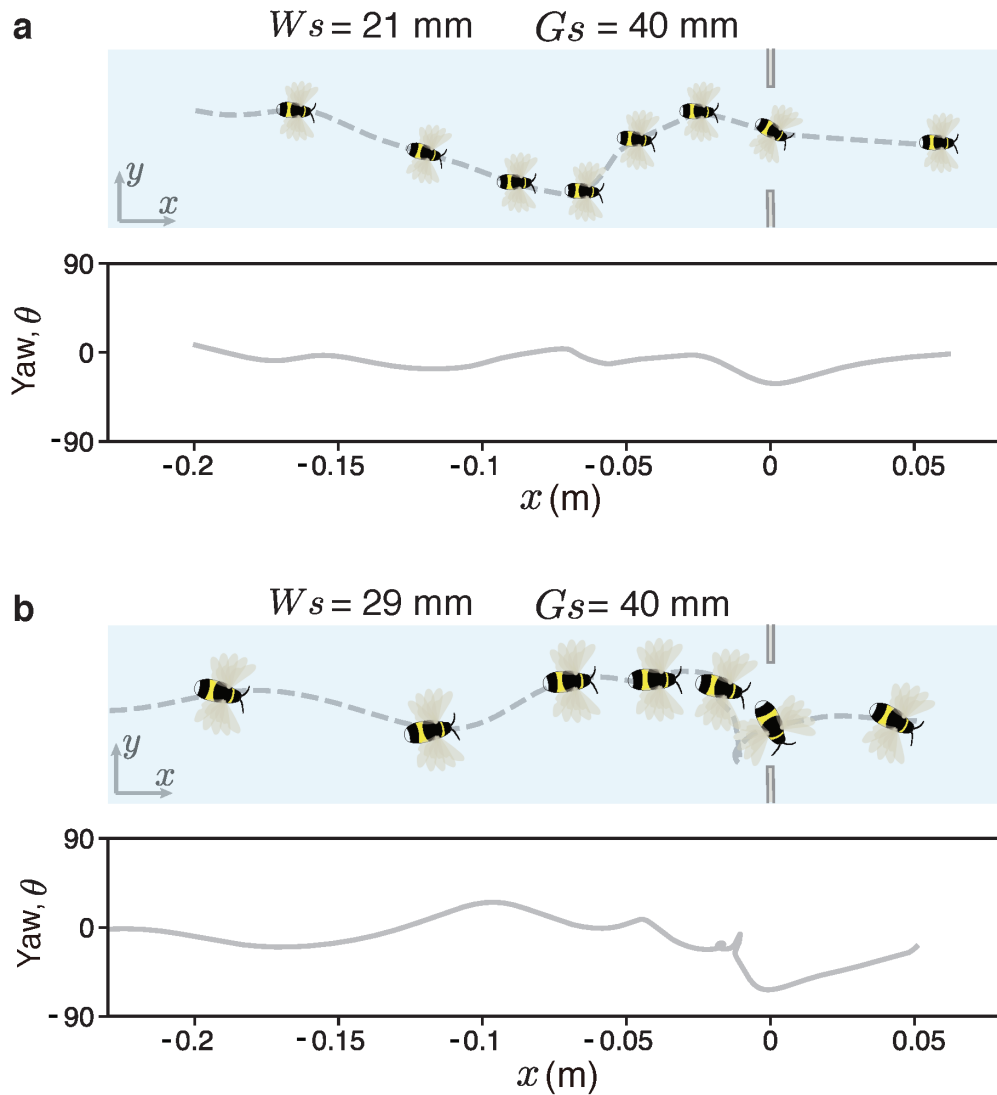

177  
 178  
 179  
 180  
 181

Figure S3: Sample flight trajectory of bees with  $W_s = 21$  and  $29\text{mm}$  (a & b) respectively flying through  $40\text{mm}$  wide gap. Instantaneous yaw angle of the bees for each flight trajectory is also plotted

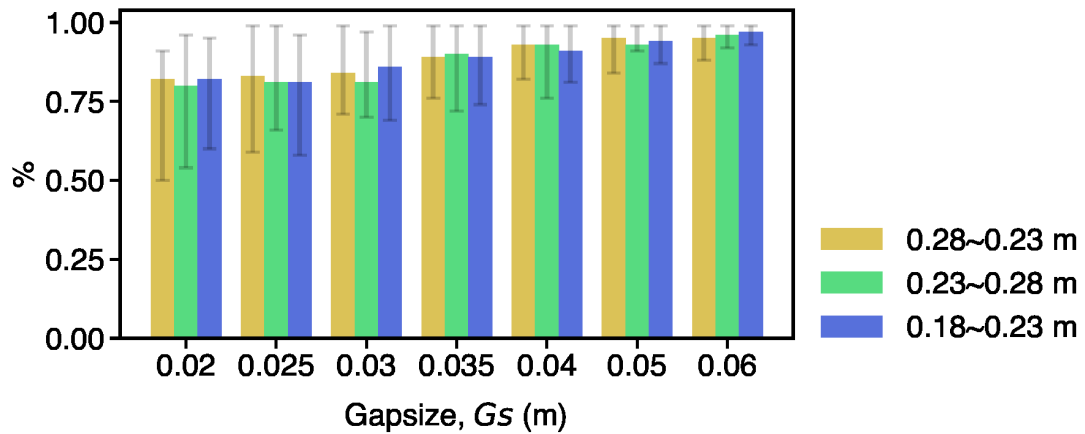

182  
 183  
 184  
 185  
 186  
 187  
 188  
 189  
 190  
 191  
 192  
 193  
 194  
 195  
 196  
 197  
 198  
 199  
 200  
 201  
 202  
 203

Figure S4: The proportion of time while the bees were in the vicinity of the gaps that any part of the gap or its edges was within 60Deg of their visual field. The mean, 5<sup>th</sup> and 95<sup>th</sup> percentiles are included. The vicinity of the gap is characterized as a 100mm square region placed 5mm from the edge of the gap. Majority of peering occurred within this region for all gaps. The region within 5mm to the gap was excluded as reorienting behaviour was initiated in this region for narrow gaps. The number of flights recorded, contacts and collisions for different gap sizes for bees with different wingspans are given in Supplementary Table S1.

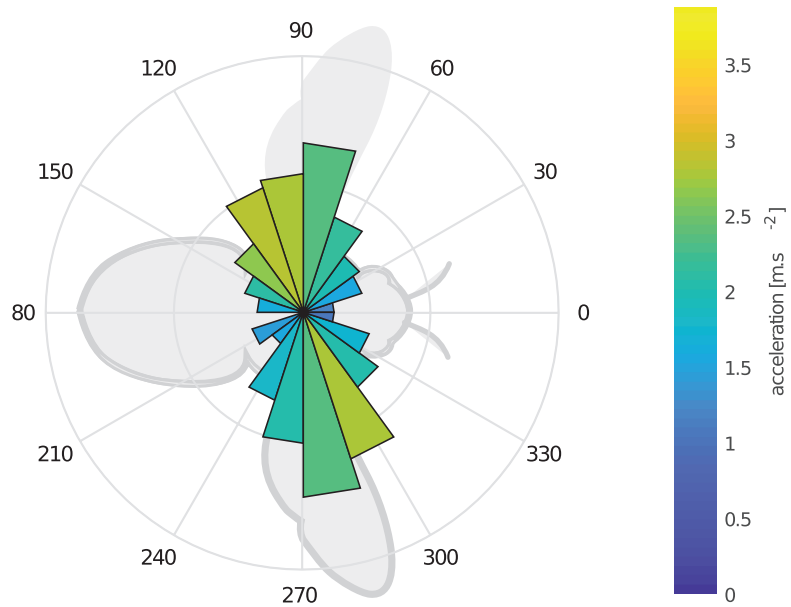

204  
 205  
 206  
 207  
 208  
 209  
 210  
 211  
 212  
 213  
 214  
 215  
 216  
 217  
 218  
 219  
 220  
 221  
 222  
 223  
 224  
 225  
 226  
 227

Figure S5: Representative rose plot of a bee's acceleration during peering when the gapsize = 25mm. The bee's wingspan = 22mm



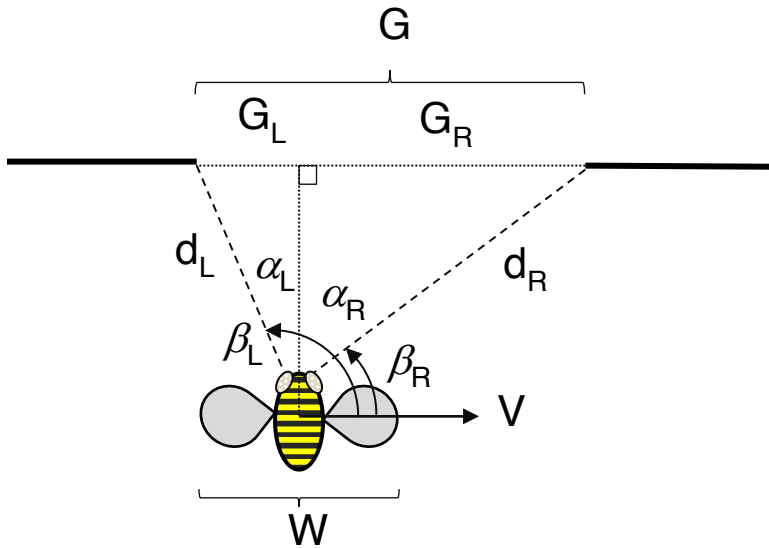

228  
229  
230  
231  
232  
233  
234  
235  
236  
237

Figure S6: Schematic of the bee flying near the gap performing lateral manoeuvres between the gap's edges.  $G$  = gapsize,  $G_r$  and  $G_l$  is the distance between the bee's lateral position and the right and left edges of the gap respectively.  $d_r$  and  $d_l$  is the vector distance between the bee's retina and the left and right edges of the gap respectively.  $\beta_L$  and  $\beta_R$  is the angle between the bees' velocity vector and the vector connecting the bee's retina and the left and right edges of the gap respectively.  $\alpha_L$  and  $\alpha_R$  is the angle between the bees' velocity vector and the vector connecting the bee's retina and the left and right edges of the gap respectively.

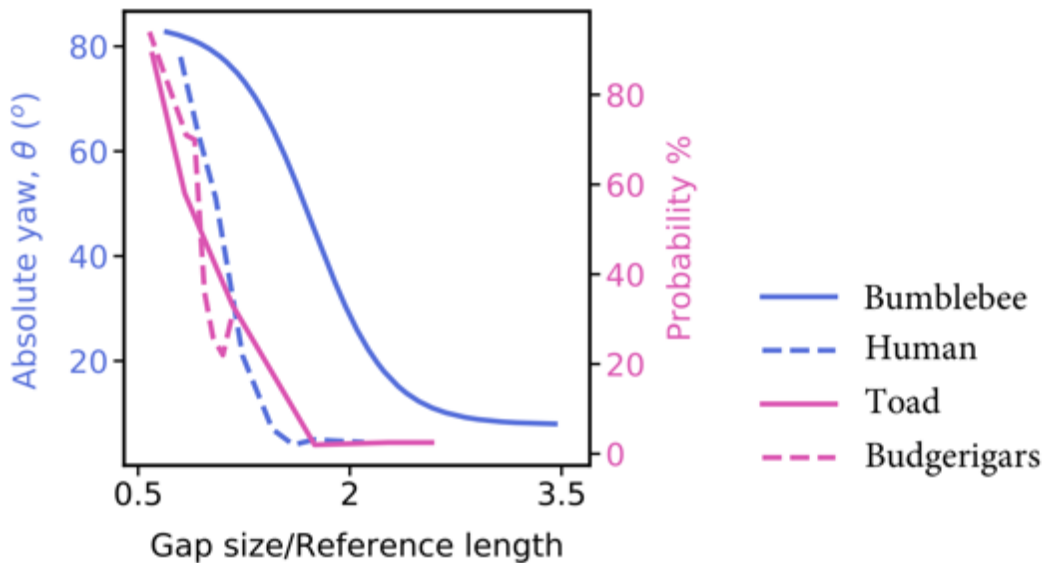

238  
239  
240  
241  
242  
243  
244  
245  
246

Figure S7: Absolute yaw angle of bumblebees and shoulder rotation of humans while passing through different gap. Gap size is normalized against the wingspan for bees while it was normalized with shoulder width in humans. Data on bumblebees from present study, sigmoidal relationship from Fig. 3b of main text. Data on humans from Fig. 1 in (19). The probability of wing tuck for budgerigars flying through gaps of different sizes that is normalized against their wingspan, data from Fig. 3 in (20) & mean wingspan = 30cm. The probability toads to detour around gaps of different sizes that is normalized against their head width, data from Fig. 2 in (21) and head width = 3cm.

247  
248

**Supplementary Tables**

| Wingspan Groups (mm) | Gapsize Treatment (mm) |         |         |         |         |         |         |
|----------------------|------------------------|---------|---------|---------|---------|---------|---------|
|                      | 20 (T1)                | 25 (T2) | 30 (T3) | 35 (T4) | 40 (T5) | 50 (T6) | 60 (T7) |
| 18-23 (G1)           | 19,8,4                 | 20,8,4  | 20,8,2  | 20,4,0  | 20,3,0  | 17,0,0  | 18,0,0  |
| 23-28 (G2)           | 20,11,9                | 19,10,6 | 20,9,6  | 20,4,0  | 18,3,0  | 18,2,0  | 18,0,0  |
| 28-33 (G3)           | 17,13,11               | 19,12,8 | 20,11,8 | 20,6,2  | 19,6,0  | 19,2,0  | 19,0,0  |

249  
250  
251  
252  
253  
254

Table S1: Table showing the total number of flights recorded, contacts and collisions for bees of different wingspans and gaps sizes. The first number in the cell represents to total number of flights recorded for bees in that wingspan range and gap size combination while the second number represents number of flights where bees made contact with the obstacle and the last number represents number of flights where wing collisions occurred.

| Gapsize Treatment | Wingspan Group | Wingspan Group | Adjusted p-value | Significance (Adjusted) |
|-------------------|----------------|----------------|------------------|-------------------------|
| T1                | G1             | G2             | 0.06             | ns                      |
| T1                | G1             | G3             | 0.84             | ns                      |
| T1                | G2             | G3             | 0.525            | ns                      |
| T2                | G1             | G2             | 0.621            | ns                      |
| T2                | G1             | G3             | 1                | ns                      |
| T2                | G2             | G3             | 0.432            | ns                      |
| T3                | G1             | G2             | 0.873            | ns                      |
| T3                | G1             | G3             | 1                | ns                      |
| T3                | G2             | G3             | 1                | ns                      |
| T4                | G1             | G2             | 1                | ns                      |
| T4                | G1             | G3             | 1                | ns                      |
| T4                | G2             | G3             | 1                | ns                      |
| T5                | G1             | G2             | 1                | ns                      |
| T5                | G1             | G3             | 1                | ns                      |
| T5                | G2             | G3             | 1                | ns                      |
| T6                | G1             | G2             | 1                | ns                      |
| T6                | G1             | G3             | 1                | ns                      |
| T6                | G2             | G3             | 1                | ns                      |
| T7                | G1             | G2             | 0.219            | ns                      |
| T7                | G1             | G3             | 1                | ns                      |
| T7                | G2             | G3             | 0.996            | ns                      |

255  
256  
257  
258  
259  
260  
261  
262  
263  
264

Table S2: Results of ANOVA tests for the peering amplitude of the bees of different wingspan groups for the different gaps (Figure 2a). Details on Wingspan groups and Gapsizes treatments is indicated in Table S1.

| Wingspan Group | Gapsize Treatment | Variable | Statistic | p-value |
|----------------|-------------------|----------|-----------|---------|
| G1             | T1                | score    | 0.9260    | 0.1462  |
| G2             | T1                | score    | 0.9786    | 0.9142  |
| G3             | T1                | score    | 0.9569    | 0.5739  |
| G1             | T2                | score    | 0.9137    | 0.0751  |
| G2             | T2                | score    | 0.9565    | 0.5057  |
| G3             | T2                | score    | 0.9019    | 0.0527  |
| G1             | T3                | score    | 0.9286    | 0.1451  |
| G2             | T3                | score    | 0.9686    | 0.7256  |
| G3             | T3                | score    | 0.9391    | 0.2302  |
| G1             | T4                | score    | 0.9485    | 0.3443  |
| G2             | T4                | score    | 0.9522    | 0.4018  |
| G3             | T4                | score    | 0.9372    | 0.2122  |
| G1             | T5                | score    | 0.9521    | 0.4004  |
| G2             | T5                | score    | 0.9599    | 0.5996  |
| G3             | T5                | score    | 0.9505    | 0.4034  |
| G1             | T6                | score    | 0.9736    | 0.8784  |
| G2             | T6                | score    | 0.8775    | 0.0237  |
| G3             | T6                | score    | 0.9242    | 0.1352  |
| G1             | T7                | score    | 0.9434    | 0.3306  |
| G2             | T7                | score    | 0.8595    | 0.0120  |
| G3             | T7                | score    | 0.9278    | 0.1576  |

266 Table S3. Results of data normality test for the peering amplitude of the bees of different wingspan  
 267 groups for the different gaps (Figure 2a). Details on Wingspan groups and Gapsize treatments is  
 268 indicated in Table S1.  
 269  
 270

| Wingspan Group | Effect             | DFd | F   | p      | p<.05    | ges | Adjusted p-value |
|----------------|--------------------|-----|-----|--------|----------|-----|------------------|
| G1             | Gapsize Treatments | 6   | 96  | 62.631 | 5.06e-31 | *   | 0.765            |
| G2             | Gapsize Treatments | 6   | 102 | 53.358 | 2.78e-29 | *   | 0.734            |
| G3             | Gapsize Treatments | 6   | 96  | 63.92  | 2.34e-31 | *   | 0.758            |

271 Table S4: Results of group ANOVA test for the peering amplitude of the bees of different wingspan  
 272 groups for the different gaps (Figure 2a). Details on Wingspan groups and Gapsize treatments is  
 273 indicated in Table S1.  
 274  
 275  
 276  
 277  
 278  
 279

| <b>Gapsize Treatment</b> | <b>Wingspan Group</b> | <b>Wingspan Group</b> | <b>Adjusted p-value</b> | <b>Significance (Adjusted)</b> |
|--------------------------|-----------------------|-----------------------|-------------------------|--------------------------------|
| T1                       | G1                    | G2                    | 0.011                   | *                              |
| T1                       | G1                    | G3                    | 3.9e-05                 | ****                           |
| T1                       | G2                    | G3                    | 0.66                    | ns                             |
| T2                       | G1                    | G2                    | 0.051                   | ns                             |
| T2                       | G1                    | G3                    | 0.001                   | **                             |
| T2                       | G2                    | G3                    | 0.185                   | ns                             |
| T3                       | G1                    | G2                    | 1                       | ns                             |
| T3                       | G1                    | G3                    | 0.012                   | *                              |
| T3                       | G2                    | G3                    | 0.000663                | ***                            |
| T4                       | G1                    | G2                    | 0.024                   | *                              |
| T4                       | G1                    | G3                    | 0.001                   | **                             |
| T4                       | G2                    | G3                    | 0.369                   | ns                             |
| T5                       | G1                    | G2                    | 0.732                   | ns                             |
| T5                       | G1                    | G3                    | 0.000128                | ***                            |
| T5                       | G2                    | G3                    | 0.005                   | **                             |
| T6                       | G1                    | G2                    | 0.708                   | ns                             |
| T6                       | G1                    | G3                    | 0.936                   | ns                             |
| T6                       | G2                    | G3                    | 0.006                   | **                             |
| T7                       | G1                    | G2                    | 0.107                   | ns                             |
| T7                       | G1                    | G3                    | 1                       | ns                             |
| T7                       | G2                    | G3                    | 0.612                   | ns                             |

Table S5: Results of ANOVA tests for the mean number of peering passes performed by bees of different wingspan groups for the different gap treatments (Figure 2b). Details on Wingspan groups and Gapsizes treatments is indicated in Table S1.

280  
281  
282  
283  
284  
285  
286  
287  
288  
289  
290  
291  
292  
293  
294  
295  
296  
297  
298  
299  
300  
301  
302

| Wingspan Group | Gapsizes Treatment | Variable | Statistic | p      |
|----------------|--------------------|----------|-----------|--------|
| G1             | T1                 | score    | 0.9359    | 0.2218 |
| G2             | T1                 | score    | 0.9606    | 0.5569 |
| G3             | T1                 | score    | 0.9106    | 0.1024 |
| G1             | T2                 | score    | 0.9596    | 0.5352 |
| G2             | T2                 | score    | 0.9372    | 0.2344 |
| G3             | T2                 | score    | 0.9452    | 0.3260 |
| G1             | T3                 | score    | 0.9533    | 0.4199 |
| G2             | T3                 | score    | 0.9237    | 0.1168 |
| G3             | T3                 | score    | 0.8902    | 0.0272 |
| G1             | T4                 | score    | 0.9148    | 0.0788 |
| G2             | T4                 | score    | 0.9347    | 0.1902 |
| G3             | T4                 | score    | 0.9187    | 0.0934 |
| G1             | T5                 | score    | 0.9412    | 0.2527 |
| G2             | T5                 | score    | 0.9463    | 0.3693 |
| G3             | T5                 | score    | 0.8652    | 0.0120 |
| G1             | T6                 | score    | 0.9240    | 0.1723 |
| G2             | T6                 | score    | 0.9150    | 0.1055 |
| G3             | T6                 | score    | 0.9352    | 0.2157 |
| G1             | T7                 | score    | 0.9253    | 0.1607 |
| G2             | T7                 | score    | 0.9649    | 0.6986 |
| G3             | T7                 | score    | 0.9542    | 0.4647 |

303 Table S6. Results of data normality test for the mean number of peering passes performed by bees  
304 of different wingspan groups for the different gap treatments (Figure 2b). Details on Wingspan  
305 groups and Gapsizes treatments is indicated in Table S1.  
306  
307  
308

| Wingspan Group | Effect              | DFd   | F      | p        | p<.05 | ges   | Adjusted p-value |
|----------------|---------------------|-------|--------|----------|-------|-------|------------------|
| G1             | Gapsizes Treatments | 49.11 | 52.812 | 1.54e-15 | *     | 0.744 | 4.62e-15         |
| G2             | Gapsizes Treatments | 49.49 | 44.611 | 6.23e-14 | *     | 0.688 | 1.869e-13        |
| G3             | Gapsizes Treatments | 53.59 | 27.13  | 2.22e-11 | *     | 0.612 | 6.66e-11         |

309 Table S7: Results of group ANOVA test for the mean number of peering passes performed by bees  
310 of different wingspan groups for the different gap treatments (Figure 2b). Details on Wingspan  
311 groups and Gapsizes treatments is indicated in Table S1.  
312  
313  
314  
315  
316  
317  
318

| Gapsize Treatment | Wingspan Group | Wingspan Group | Unadjusted p-value | Significance (Unadjusted) | Adjusted p-value | Significance (Adjusted) |
|-------------------|----------------|----------------|--------------------|---------------------------|------------------|-------------------------|
| T1                | G1             | G2             | 0.787              | ns                        | 1                | ns                      |
| T1                | G1             | G3             | 0.996              | ns                        | 1                | ns                      |
| T1                | G2             | G3             | 0.799              | ns                        | 1                | ns                      |
| T2                | G1             | G2             | 0.281              | ns                        | 0.844            | ns                      |
| T2                | G1             | G3             | 9.85e-05           | ****                      | 0.000296         | ***                     |
| T2                | G2             | G3             | 0.00262            | **                        | 0.00787          | **                      |
| T3                | G1             | G2             | 0.0441             | *                         | 0.132            | ns                      |
| T3                | G1             | G3             | 2.75e-05           | ****                      | 8.24e-05         | ****                    |
| T3                | G2             | G3             | 0.0315             | *                         | 0.0944           | ns                      |
| T4                | G1             | G2             | 4.32e-06           | ****                      | 1.3e-05          | ****                    |
| T4                | G1             | G3             | 6.99e-11           | ****                      | 2.1e-10          | ****                    |
| T4                | G2             | G3             | 0.000736           | ***                       | 0.00221          | **                      |
| T5                | G1             | G2             | 7.09e-05           | ****                      | 0.000213         | ***                     |
| T5                | G1             | G3             | 5.02e-10           | ****                      | 1.51e-09         | ****                    |
| T5                | G2             | G3             | 0.00192            | **                        | 0.00576          | **                      |
| T6                | G1             | G2             | 0.0263             | *                         | 0.0788           | ns                      |
| T6                | G1             | G3             | 6.42e-14           | ****                      | 1.92e-13         | ****                    |
| T6                | G2             | G3             | 1.18e-08           | ****                      | 3.53e-08         | ****                    |
| T7                | G1             | G2             | 0.00161            | **                        | 0.00482          | **                      |
| T7                | G1             | G3             | 0.000505           | ***                       | 0.00152          | **                      |
| T7                | G2             | G3             | 0.541              | ns                        | 1                | ns                      |

Table S8: Results of ANOVA tests for the yaw angle of the bees of different wingspan groups as they passed through the different gap treatments (Figure 3a). Details on Wingspan groups and Gapsize treatments is indicated in Table S1.

319  
320  
321  
322  
323  
324  
325  
326  
327  
328  
329  
330  
331  
332  
333  
334  
335  
336  
337  
338  
339  
340

| <b>Wingspan Group</b> | <b>Gapsizes Treatment</b> | <b>Outlier ID</b> | <b>Score</b> | <b>Outlier</b> | <b>Extreme outlier</b> |
|-----------------------|---------------------------|-------------------|--------------|----------------|------------------------|
| G3                    | T2                        | P1                | 67.11        | TRUE           | FALSE                  |
| G2                    | T3                        | P27               | 90           | TRUE           | FALSE                  |
| G2                    | T4                        | P1                | 27,515       | TRUE           | FALSE                  |
| G3                    | T4                        | P16               | 88,322       | TRUE           | FALSE                  |
| G3                    | T4                        | P17               | 90           | TRUE           | FALSE                  |
| G1                    | T5                        | P27               | 69,428       | TRUE           | FALSE                  |
| G1                    | T5                        | P28               | 70,343       | TRUE           | FALSE                  |
| G3                    | T5                        | P1                | 97,278       | TRUE           | TRUE                   |
| G3                    | T5                        | P2                | 13,923       | TRUE           | TRUE                   |
| G1                    | T7                        | P30               | 40,799       | TRUE           | FALSE                  |
| G1                    | T7                        | P31               | 42,078       | TRUE           | TRUE                   |

Table S9: Results of outlier test for the yaw angle of the bees of different wingspan groups as they passed through the different gap treatments (Figure 3a). Details on Wingspan groups and Gapsizes treatments is indicated in Table S1.

341  
342  
343  
344  
345  
346  
347  
348  
349  
350  
351  
352  
353  
354  
355  
356  
357  
358  
359  
360  
361  
362  
363  
364  
365  
366  
367  
368  
369  
370  
371  
372  
373  
374  
375  
376  
377  
378

| Wingspan Group | Gapsize Treatment | Variable | Statistic | p        |
|----------------|-------------------|----------|-----------|----------|
| G1             | T1                | score    | 0.9435    | 0.1031   |
| G2             | T1                | score    | 0.9305    | 0.0635   |
| G3             | T1                | score    | 0.9438    | 0.1658   |
| G1             | T2                | score    | 0.9420    | 0.0405   |
| G2             | T2                | score    | 0.9747    | 0.5513   |
| G3             | T2                | score    | 0.9658    | 0.6136   |
| G1             | T3                | score    | 0.9756    | 0.4672   |
| G2             | T3                | score    | 0.9484    | 0.1961   |
| G3             | T3                | score    | 0.9405    | 0.1524   |
| G1             | T4                | score    | 0.9658    | 0.4121   |
| G2             | T4                | score    | 0.9673    | 0.1890   |
| G3             | T4                | score    | 0.8645    | 0.0041   |
| G1             | T5                | score    | 0.8762    | 0.0033   |
| G2             | T5                | score    | 0.9720    | 0.4841   |
| G3             | T5                | score    | 0.7339    | 6.70E+08 |
| G1             | T6                | score    | 0.9635    | 0.1858   |
| G2             | T6                | score    | 0.9691    | 0.3832   |
| G3             | T6                | score    | 0.9746    | 0.5998   |
| G1             | T7                | score    | 0.8367    | 0.0003   |
| G2             | T7                | score    | 0.9796    | 0.7037   |
| G3             | T7                | score    | 0.9594    | 0.3381   |

379 Table S10. Results of data normality test for the yaw angle of the bees of different wingspan groups  
380 as they passed through the different gap treatments (Figure 3a). Details on Wingspan groups and  
381 Gapsize treatments is indicated in Table S1.  
382  
383  
384

| Wingspan Group | Effect             | DFd   | F         | p        | p<.05 | ges   | Adjusted p-value |
|----------------|--------------------|-------|-----------|----------|-------|-------|------------------|
| G1             | Gapsize Treatments | 35.4  | 1,135,923 | 3.2e-30  | *     | 0.876 | 9.6e-30          |
| G2             | Gapsize Treatments | 79.68 | 3,136,643 | 6.79e-83 | *     | 0.886 | 2.04E-79         |
| G3             | Gapsize Treatments | 55.81 | 445.04    | 8.99e-38 | *     | 0.86  | 2.70E-34         |

385 Table S11: Results of group ANOVA test for the yaw angle of the bees of different wingspan groups  
386 as they passed through the different gap treatments (Figure 3a). Details on Wingspan groups and  
387 Gapsize treatments is indicated in Table S1.  
388  
389  
390  
391  
392  
393  
394



395 **Supplementary Videos**

396

397 SV1: Animation of the experiment setup with a cartoon of a bumblebee approaching a narrow gap  
398 and flying through it.

399

400 SV2: Representative video of a bumblebee with wingspan = 27.5mm encountering a 25mm wide  
401 gap. The bee scans the gap by performing lateral peering motion between the edges of the gap  
402 before passing through it by reorienting itself from increasing its yaw/heading angle. Some contact  
403 between the bee's antennae and legs with the edges of the gap can be noted. Upon passing  
404 through the gap the bees right themselves to realign with their flight direction.

405

406 SV3: Representative video of a bumblebee with wingspan = 26 mm encountering a 50 mm wide  
407 gap. The bee scans the gap by peering between the edges and traverses through it without any  
408 change in yaw angle.

409

410 SV4: Representative video of a bumblebee with wingspan = 25.6 mm encountering a 35 mm wide  
411 gap. The bee scans the gap by performing lateral peering motion between the edges of the gap  
412 before passing through it. Though the bee reorients itself by increasing its yaw angle, the  
413 reorientation is not as high as those noted when passing smaller gaps (SV2).

414

415 SV5: Representative close up video of a bumblebee of wingspan = 23 mm passing through a 20  
416 mm wide gap. The bee reorients to safely pass through the gap. Some contact between the bee's  
417 antennae with the edges of the gap can also be noted.

418

419 SV6: Representative video of a bumblebee with wingspan = 26.8 mm encountering a 25 mm wide  
420 gap. The bee scans the gap by performing lateral peering motion between the edges of the gap  
421 before passing through it. Contact between the bee's antennae and legs with the edges of the gap  
422 can be noted.

423

424 SV7: Representative video of a bumblebee with wingspan = 26 mm encountering a 20 mm wide  
425 gap. The bee appears to head-butt the obstacle as it reorients itself and fly through the gap. The  
426 head-butt appears to be deliberate since leg extension reflex is not noted.

427

428

429

**Dataset**

430 Dataset file includes all data used to create Figures 2 & 3 of the main text. All data arranged in as  
431 separate pages. Number\_of\_Peering\_Passes: data of number of peering passes performed by the  
432 bees of different sizes ahead of the different gaps. Peering\_Amplitude: data of the amplitude the  
433 bees peered ahead of the different gaps. Peering\_Time\_vs\_Gapsize: data of time bees of different  
434 size spent peering ahead of the gaps. Yaw\_Angle\_of\_Bees\_vs\_Gapsize: data of the yaw or  
435 heading angle of the bees as they crossed the different gaps. %\_of\_Wing\_Collision\_with\_Gap:  
436 data of the percent of time bees of different sizes collided with the gaps.  
437 %\_of\_Head&Body\_Contact\_with\_Gap: data of the percent of time the bees' body or head made  
438 contact with the gap/

439

440

441

442

443

444

445

446

447

448

449  
450  
451  
452  
453  
454  
455  
456  
457  
458  
459  
460  
461  
462  
463  
464  
465  
466  
467  
468  
469  
470  
471  
472  
473  
474  
475  
476  
477  
478  
479  
480  
481  
482  
483  
484  
485  
486  
487  
488  
489  
490  
491  
492  
493  
494

## SI References

1. A. Werner, W. Stürzl, J. Zanker, Object recognition in flight: How do bees distinguish between 3D shapes? *PLoS One* **11** (2016).
2. S. Ravi, *et al.*, Gap perception in bumblebees. *J. Exp. Biol.* **222** (2019).
3. M. Egelhaaf, N. Boeddeker, R. Kern, R. Kurtz, J. P. Lindemann, Spatial vision in insects is facilitated by shaping the dynamics of visual input through behavioral action. *Front. Neural Circuits* **6**, 108 (2012).
4. M. V Srinivasan, S. W. Zhang, Visual control of honeybee flight. *EXS* **84**, 95–113 (1997).
5. D. Floreano, J. C. Zufferey, M. V. Srinivasan, C. Ellington, *Flying Insects and Robots*, D. Floreano, J.-C. Zufferey, M. V. Srinivasan, C. Ellington, Eds. (Springer Berlin Heidelberg, 2010) <https://doi.org/10.1007/978-3-540-89393-6>.
6. M. V. Srinivasan, M. Lehrer, Temporal acuity of honeybee vision: behavioural studies using moving stimuli. *J. Comp. Physiol. A* **155**, 297–312 (1984).
7. F. T. Muijres, M. J. Elzinga, J. M. Melis, M. H. Dickinson, Flies evade looming targets by executing rapid visually directed banked turns. *Science* **344**, 172–7 (2014).
8. S. Ravi, *et al.*, Bumblebees minimize control challenges by combining active and passive modes in unsteady winds. *Sci. Rep.* **6**, 35043 (2016).
9. G. K. Taylor, Mechanics and aerodynamics of insect flight control. *Biol. Rev. Camb. Philos. Soc.* **76**, 449–471 (2001).
10. S. Ravi, *et al.*, Bumblebees minimize control challenges by combining active and passive modes in unsteady winds. *Sci. Rep.* **6** (2016).
11. F. van Breugel, K. Morgansen, M. H. Dickinson, Monocular distance estimation from optic flow during active landing maneuvers. *Bioinspir. Biomim.* **9**, 025002 (2014).
12. J. R. Serres, F. Ruffier, Optic flow-based collision-free strategies: From insects to robots. *Arthropod Struct. Dev.* **46**, 703–717 (2017).
13. O. J. N. Bertrand, J. P. Lindemann, M. Egelhaaf, A Bio-inspired Collision Avoidance Model Based on Spatial Information Derived from Motion Detectors Leads to Common Routes. *PLoS Comput. Biol.* **11**, e1004339 (2015).
14. J. J. Gibson, P. Olum, F. Rosenblatt, Parallax and perspective during aircraft landings. *Am. J. Psychol.* **68**, 372–85 (1955).
15. M. V Srinivasan, Honey bees as a model for vision, perception, and cognition. *Annu. Rev. Entomol.* **55**, 267–84 (2010).
16. J. Hateren, C. Schilstra, Hateren, Schilstra, Blowfly flight and optic flow. II. Head movements during flight. *J. Exp. Biol.* **202** (Pt 11), 1491–500 (1999).
17. N. Boeddeker, J. M. Hemmi, Visual gaze control during peering flight manoeuvres in honeybees. *Proceedings. Biol. Sci.* **277**, 1209–17 (2010).
18. N. Boeddeker, *et al.*, The fine structure of honeybee head and body yaw movements in a homing task. *Proc. R. Soc. B Biol. Sci.* **277**, 1899–1906 (2010).
19. W. H. Warren, S. Whang, Visual guidance of walking through apertures: body-scaled information for affordances. *J. Exp. Psychol. Hum. Percept. Perform.* **13**, 371–83 (1987).
20. I. Schiffner, H. D. Vo, P. S. Bhagavatula, M. V Srinivasan, Minding the gap: in-flight body awareness in birds. *Front. Zool.* **11**, 64 (2014).
21. , The three-dimensional world of a toad. *Proc. R. Soc. London. Ser. B. Biol. Sci.* **206**, 481–487 (1980).
